# Supplementary material for: In Experimental Dilated Cardiomyopathy Heart Failure and Survival Are Adversely Affected by a Lack of Sexual Interactions
Source: PubMed Central journal article supplement (PMC7432836; doi:10.3390/ijms21155450), 2020-07-30
Supplement: ijms-21-05450-s001.pdf [file ijms-21-05450-s001.pdf]

Supplementary Materials: Supplementary Materials can be found at [www.mdpi.com/xxx/s1](http://www.mdpi.com/xxx/s1).

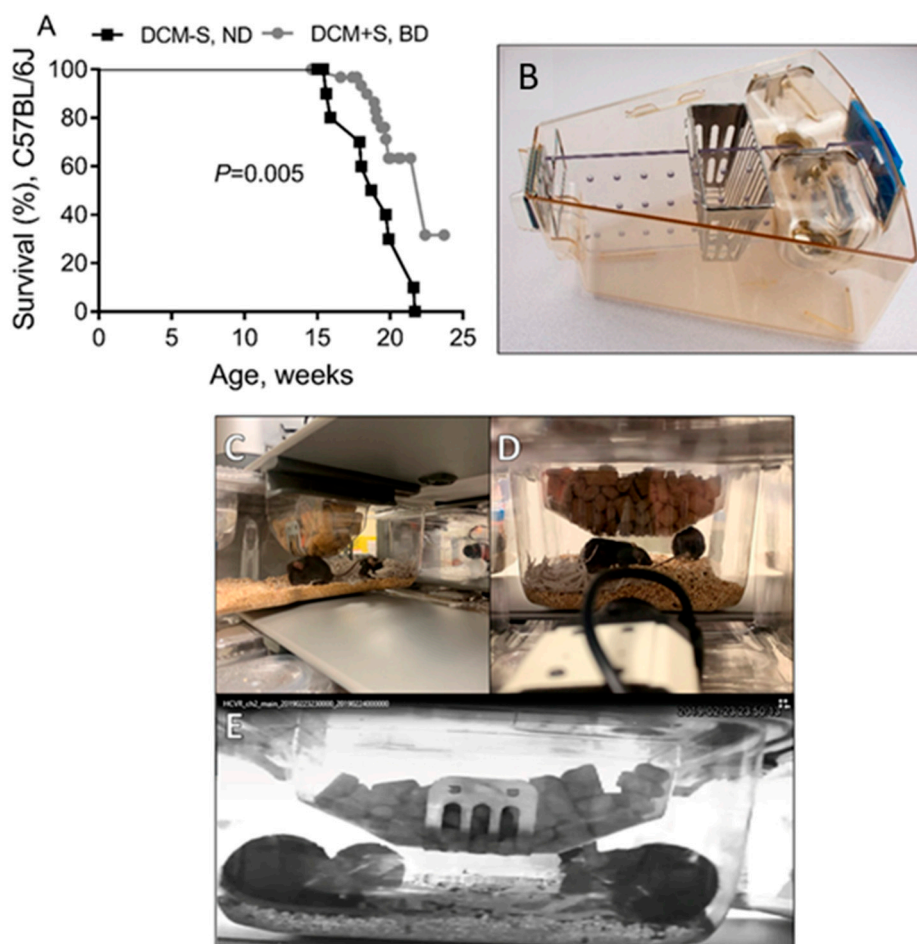

**Figure 1.** Deprivation of sexual activity shortens survival in mice with DCM. (A) Kaplan Meier survival curve of DCM+S ( $n = 32$ ) vs. DCM-S ( $n = 19$ ), on C57BL/6J genetic background. (B) Example of the porous social divider (Unimice Cage Divider Kit w/Social Holes, Animal Care Systems, Centennial, CO, USA). (C,D) Representative camera setup for breeding activity recording. (E) Example of a still image from video recording using multi-camera digital video recorders (DVR).

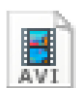

DCM-S, BD.avi

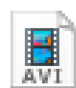

DCM+S, BD.avi

**Figure 2.** Sexual deprivation affects cardiac function in DCM male mice. (A,B) Representative cardiac MRI videos of (A) DCM-S (132 days) presence of the ventricular and atrial dilation, left atrial thrombosis and pleural effusion compared to (B) DCM+S (148 days). Click on the included image to play the video of MRI scans.

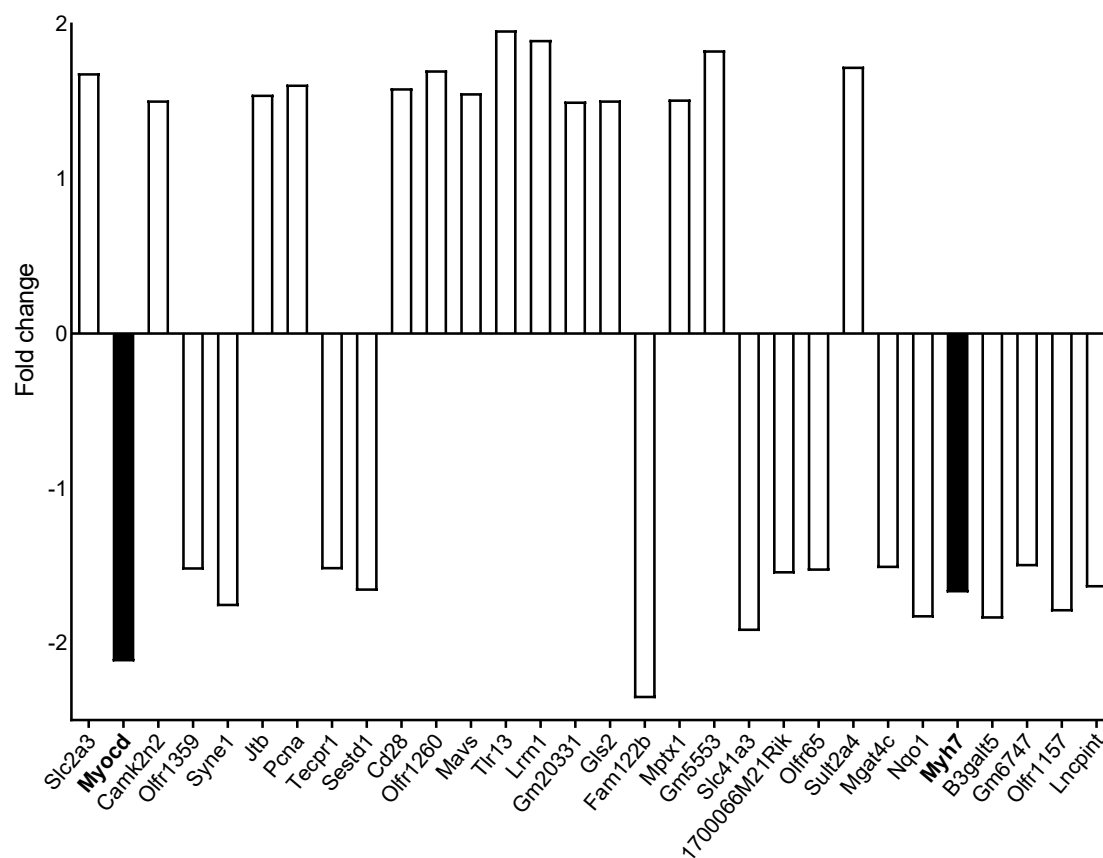

**Figure 3.** Sexual activity deprivation modulates expression of contractile protein genes *Myocd* and *Myh7* levels in mice with DCM. Fold-change in transcript levels of the differentially expressed genes analyzed by microarray in left ventricular (LV) tissue of DCM+S vs. DCM-S, on breeding diet ( $n = 4$  per group).

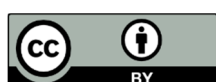

© 2020 by the authors. Submitted for possible open access publication under the terms and conditions of the Creative Commons Attribution (CC BY) license (<http://creativecommons.org/licenses/by/4.0/>).
